# Supplementary material for: The effect of exercise during pregnancy on gestational diabetes mellitus in normal-weight women: a systematic review and meta-analysis
Source: PubMed Central journal article supplement (PMC6233372; doi:10.1186/s12884-018-2068-7), 2018-11-12

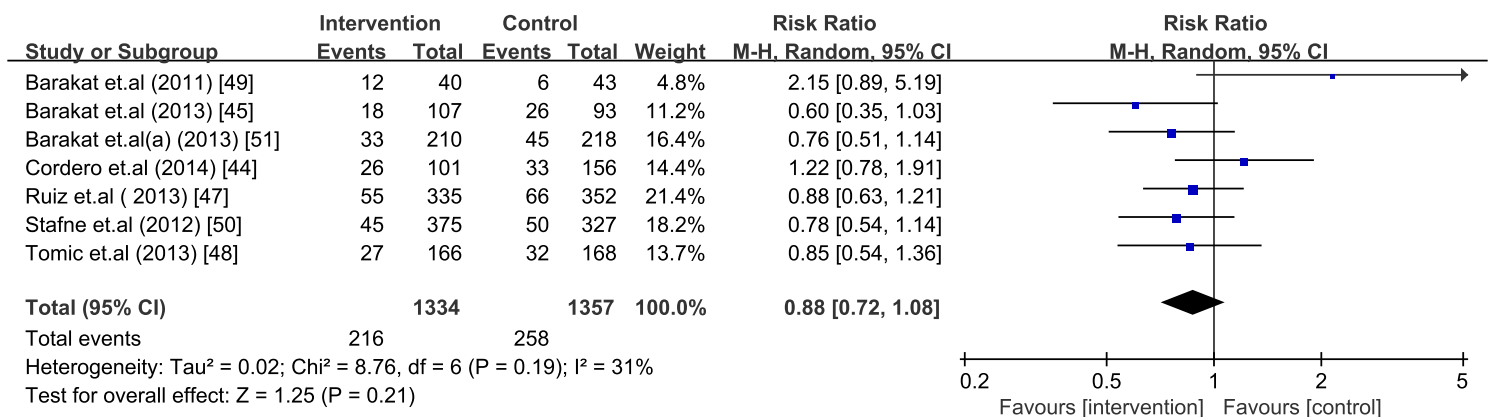

Supplement: 12884_2018_2068_MOESM5_ESM.pdf [file 12884_2018_2068_MOESM5_ESM.pdf]
