# Supplementary material for: The effect of exercise during pregnancy on gestational diabetes mellitus in normal-weight women: a systematic review and meta-analysis
Source: Springer Nature journal article supplement (doi:10.1186/s12884-018-2068-7), 2018-11-12

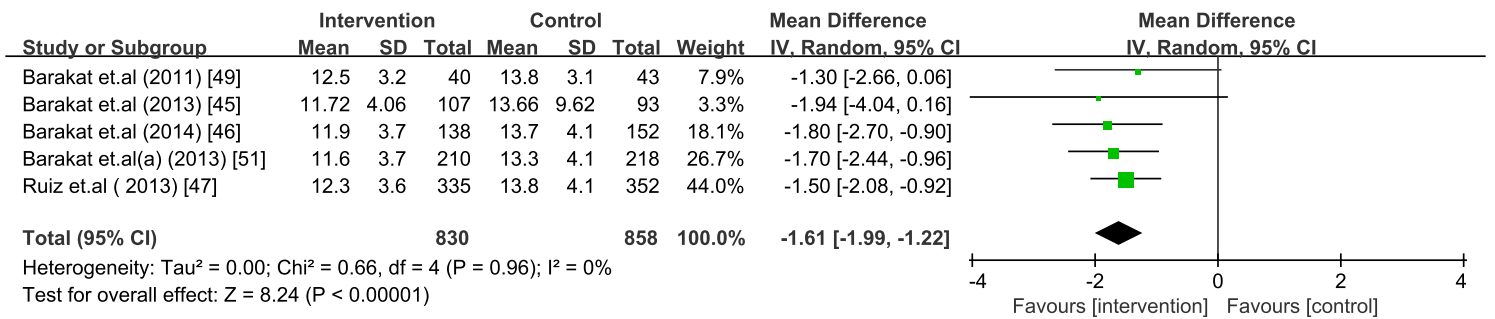

Supplement: MOESM2 [file 16267270]
