# Supplementary material for: The effect of exercise during pregnancy on gestational diabetes mellitus in normal-weight women: a systematic review and meta-analysis
Source: Springer Nature journal article supplement (doi:10.1186/s12884-018-2068-7), 2018-11-12

| Study or Subgroup            | Intervention |        |             | Control  |        |             | Weight        | Mean Difference<br>IV, Random, 95% CI |
|------------------------------|--------------|--------|-------------|----------|--------|-------------|---------------|---------------------------------------|
|                              | Mean         | SD     | Total       | Mean     | SD     | Total       |               |                                       |
| Barakat et.al (2011) [49]    | 3,404        | 465    | 40          | 3,465    | 411    | 43          | 3.2%          | -61.00 [-250.36, 128.36]              |
| Barakat et.al (2013) [45]    | 3,186.6      | 440.76 | 107         | 3,261.18 | 466.59 | 93          | 7.1%          | -74.58 [-200.94, 51.78]               |
| Barakat et.al (2014) [46]    | 3,203        | 461    | 138         | 3,232    | 448    | 152         | 10.4%         | -29.00 [-133.82, 75.82]               |
| Barakat et.al(a) (2013) [51] | 3,201        | 446    | 210         | 3,257    | 469    | 218         | 15.2%         | -56.00 [-142.69, 30.69]               |
| Cordero et.al (2014) [44]    | 3,324.1      | 433.1  | 101         | 3,250.1  | 425.01 | 156         | 9.9%          | 74.00 [-33.62, 181.62]                |
| Ruiz et.al (2013) [47]       | 3,219        | 433    | 335         | 3,215    | 419    | 352         | 28.1%         | 4.00 [-59.76, 67.76]                  |
| Stafne et.al (2012) [50]     | 3,515        | 534    | 375         | 3,523    | 546    | 327         | 17.8%         | -8.00 [-88.15, 72.15]                 |
| Tomic et.al (2013) [48]      | 3,292.1      | 536.5  | 166         | 3,374.3  | 550.1  | 168         | 8.4%          | -82.20 [-198.73, 34.33]               |
| <b>Total (95% CI)</b>        |              |        | <b>1472</b> |          |        | <b>1509</b> | <b>100.0%</b> | <b>-18.70 [-52.49, 15.08]</b>         |

Heterogeneity: Tau<sup>2</sup> = 0.00; Chi<sup>2</sup> = 6.24, df = 7 (P = 0.51); I<sup>2</sup> = 0%  
 Test for overall effect: Z = 1.09 (P = 0.28)

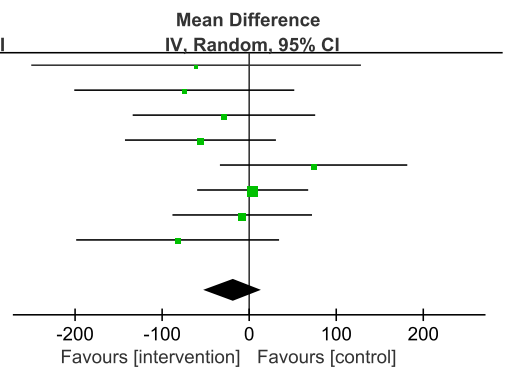

Supplement: MOESM4 [file 16267270]
