# Supplementary material for: The effect of exercise during pregnancy on gestational diabetes mellitus in normal-weight women: a systematic review and meta-analysis
Source: Springer Nature journal article supplement (doi:10.1186/s12884-018-2068-7), 2018-11-12
Supplement: MOESM6 [file 16267270]

## Summary of findings tables

### 1 The effect of exercise during pregnancy on GDM

| The effect of exercise during pregnancy on GDM                          |                                          |                                                                                                                      |                               |                              |                                                 |          |
|-------------------------------------------------------------------------|------------------------------------------|----------------------------------------------------------------------------------------------------------------------|-------------------------------|------------------------------|-------------------------------------------------|----------|
| <b>Patient or population:</b> patients with GDM                         |                                          |                                                                                                                      |                               |                              |                                                 |          |
| <b>Settings:</b> Pregnant women                                         |                                          |                                                                                                                      |                               |                              |                                                 |          |
| <b>Intervention:</b> exercise                                           |                                          |                                                                                                                      |                               |                              |                                                 |          |
| Outcomes                                                                | Illustrative comparative risks* (95% CI) |                                                                                                                      | Relative effect (95% CI)      | No of Participants (studies) | Quality of the evidence (GRADE)                 | Comments |
|                                                                         | Assumed risk                             | Corresponding risk                                                                                                   |                               |                              |                                                 |          |
|                                                                         | Control                                  | Exercise                                                                                                             |                               |                              |                                                 |          |
| gestational diabetes mellitus(1)<br>follow-up<br>Follow-up: 16-34 weeks | Study population                         |                                                                                                                      | RR 0.58<br><br>(0.37 to 0.90) | 2981<br>(8 studies)          | ⊕ ⊕ ⊕ ⊕<br><b>very low</b> <sup>1,2,3,4</sup>   |          |
|                                                                         | 97 per 1000                              | 56 per 1000<br>(36 to 87)                                                                                            |                               |                              |                                                 |          |
|                                                                         | Moderate                                 |                                                                                                                      |                               |                              |                                                 |          |
|                                                                         | 74 per 1000                              | 43 per 1000<br>(27 to 67)                                                                                            |                               |                              |                                                 |          |
| gestational diabetes mellitus(2)<br>follow-up<br>Follow-up: 16-34 weeks | Study population                         |                                                                                                                      | RR 0.60<br><br>(0.36 to 0.98) | 2981<br>(8 studies)          | ⊕ ⊕ ⊕ ⊕<br><b>very low</b> <sup>1,3,4,5</sup>   |          |
|                                                                         | 77 per 1000                              | 46 per 1000<br>(28 to 75)                                                                                            |                               |                              |                                                 |          |
|                                                                         | Moderate                                 |                                                                                                                      |                               |                              |                                                 |          |
|                                                                         | 73 per 1000                              | 43 per 1000<br>(26 to 71)                                                                                            |                               |                              |                                                 |          |
| gestational weight gain<br>Follow-up<br>Follow-up: 16-34 weeks          |                                          | The mean gestational weight gain in the intervention groups was -1.61 <b>lower</b><br>(-2.28 lower to 0.54 higher)   |                               | 1690<br>(5 studies)          | ⊕ ⊕ ⊕ ⊕<br><b>very low</b> <sup>1,2,3,4,5</sup> |          |
| gestational age at birth<br>Follow-up<br>Follow-up: 16-34 weeks         |                                          | The mean gestational age at birth in the intervention groups was -0.55 <b>higher</b><br>(-1.57 lower to 0.47 higher) |                               | 2981<br>(8 studies)          | ⊕ ⊕ ⊕ ⊕<br><b>very low</b> <sup>1,2,3,4,5</sup> |          |
| Birth weight<br>Follow-up<br>Follow-up: 16-34 weeks                     |                                          | The mean birth weight in the intervention groups was -18.7 <b>lower</b><br>(-52.49 lower to 15.08 higher)            |                               | 2981<br>(7 studies)          | ⊕ ⊕ ⊕ ⊕<br><b>very low</b> <sup>1,2,3,4,5</sup> |          |
| caesarean                                                               | Study population                         |                                                                                                                      | RR 0.88                       | 2691                         | ⊕ ⊕ ⊕ ⊕                                         |          |

|                                        |                     |                                     |                |             |                                      |  |
|----------------------------------------|---------------------|-------------------------------------|----------------|-------------|--------------------------------------|--|
| <b>section</b>                         | <b>194 per 1000</b> | <b>171 per 1000</b><br>(134 to 217) |                | (7 studies) | <b>very low</b> <sup>1,2,3,4,5</sup> |  |
| Follow-up<br>Follow-up: 16-34<br>weeks | <b>Moderate</b>     |                                     | (0.72 to 1.08) |             |                                      |  |
|                                        | <b>204 per 1000</b> | <b>180 per 1000</b><br>(141 to 228) |                |             |                                      |  |

\*The basis for the **assumed risk** (e.g. the median control group risk across studies) is provided in footnotes. The **corresponding risk** (and its 95% confidence interval) is based on the assumed risk in the comparison group and the **relative effect** of the intervention (and its 95% CI).

**CI:** Confidence interval; **RR:** Risk ratio;

GRADE Working Group grades of evidence

**High quality:** Further research is very unlikely to change our confidence in the estimate of effect.

**Moderate quality:** Further research is likely to have an important impact on our confidence in the estimate of effect and may change the estimate.

**Low quality:** Further research is very likely to have an important impact on our confidence in the estimate of effect and is likely to change the estimate.

**Very low quality:** We are very uncertain about the estimate.

*Footnotes*

- <sup>1</sup> Consistency was downgraded because the heterogeneity across included studies was high.
- <sup>2</sup> Precision was downgraded because sample sizes are relatively small in several trials.
- <sup>3</sup> Funnel plot indicated publication bias.
- <sup>4</sup> Confounding factor, like dietary, may change the effect.
- <sup>5</sup> Risk of bias was serious because there existed reporting bias and selection bias.
